# Supplementary material
Source: HighWire-hosted journal article supplement (https://www.cmajopen.ca/highwire/filestream/81014/field_highwire_adjunct_files/3/open-2016-0122-4_at.pdf)
Supplement: open-2016-0122-4_at.pdf [file open-2016-0122-4_at.pdf]

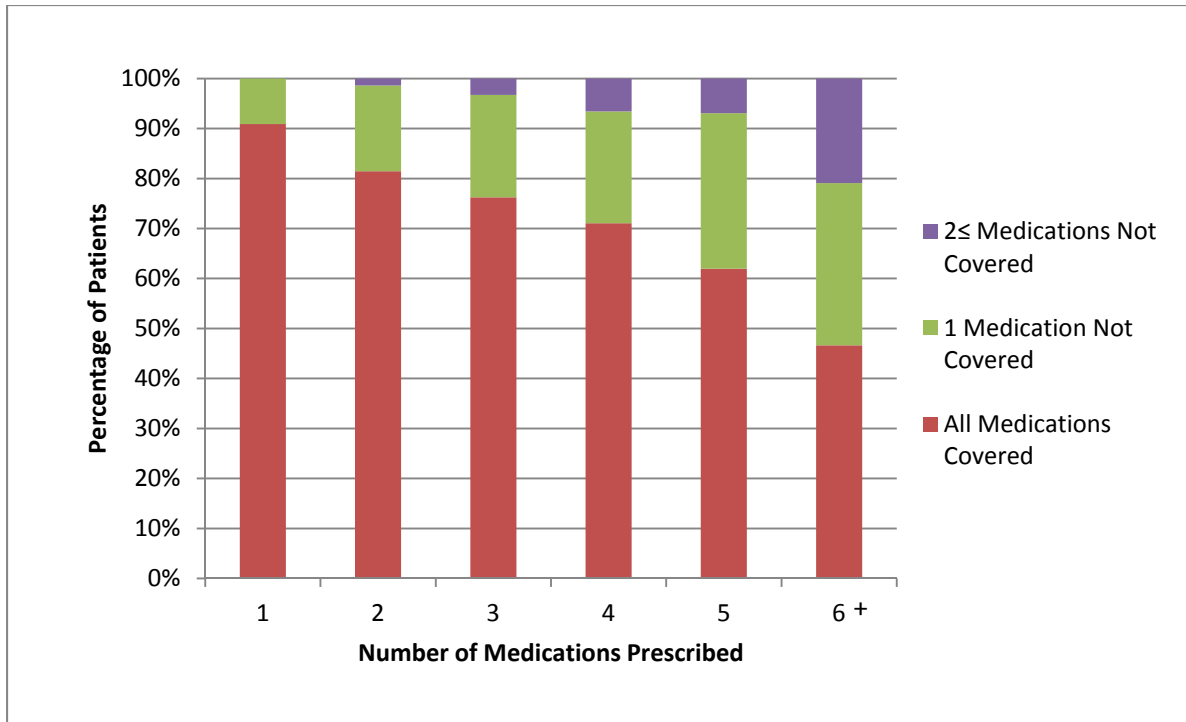

**Appendix 4 (as supplied by the authors): Coverage of the essential medicines list at the St. Michael's Inner City Clinic stratified by the number of prescriptions received by each patient**
